# Supplementary material for: The Nitrogen Atom of Vitamin B6 Is Essential for the Catalysis of Radical Aminomutases
Source: MDPI journal article supplement (doi:10.3390/ijms23095210), 2022-05-06
Supplement: s1 [file s1]

## Supplemental Information

### The Nitrogen Atom of Vitamin B<sub>6</sub> Is Essential for the Catalysis of Radical Aminomutases

Amarendra Nath Maity, Jun-Ru Chen, Quan-Yuan Li, Shyue-Chu Ke\*

Department of Physics, National Dong Hwa University, Hualien, Taiwan 97401

\*Corresponding author: e-mail address: ke@gms.ndhu.edu.tw

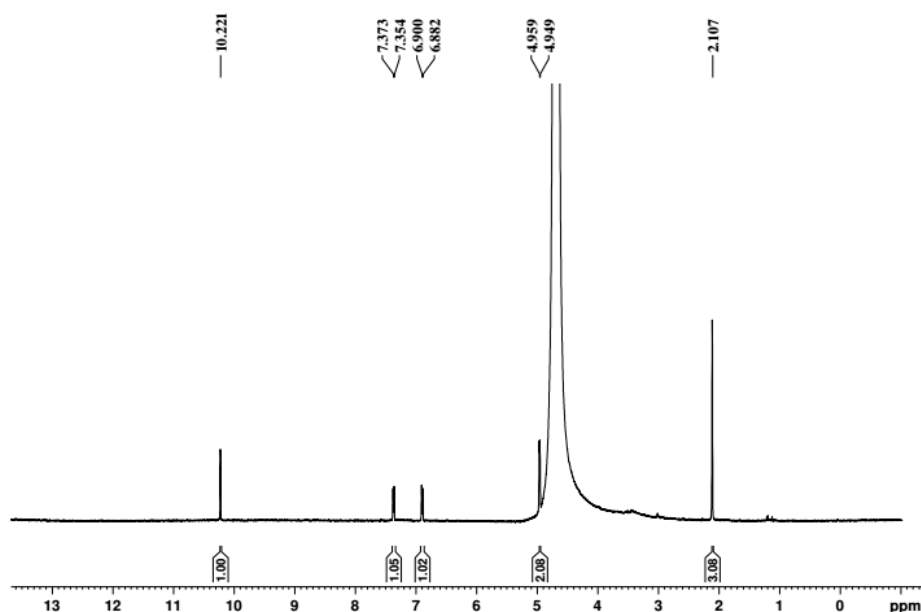

**Figure S1.** <sup>1</sup>H NMR spectrum of dAPLP in D<sub>2</sub>O.

#### Elemental Composition Report

Page 1

##### Single Mass Analysis

Tolerance = 200.0 PPM / DBE: min = -20.0, max = 100.0

Element prediction: Off

Number of isotope peaks used for i-FIT = 3

Monoisotopic Mass, Even Electron Ions

234 formula(e) evaluated with 53 results within limits (up to 20 closest results for each mass)

Elements Used:

C: 1-100 H: 1-10 O: 1-10 P: 1-3 Na: 0-1

deazaPLP

190215esi01 68 (1.002) Cm (67.70)

1: TOF MS ES-  
3.70e+007

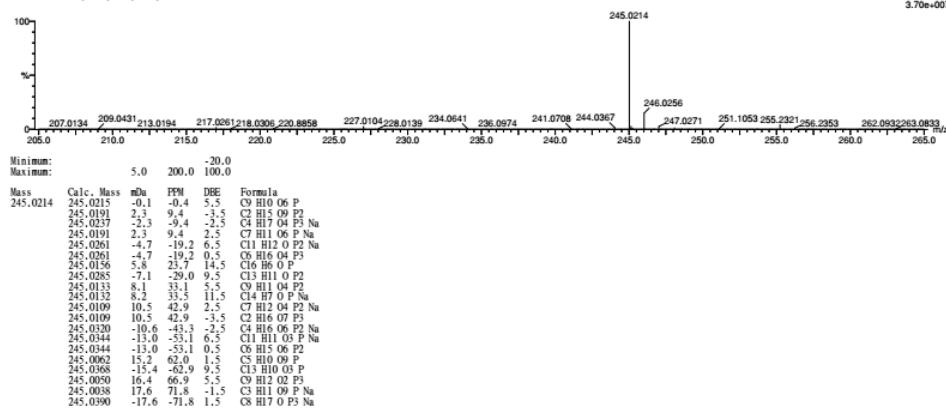

**Figure S2.** HRESI Mass spectrum of dAPLP in negative ion mode.

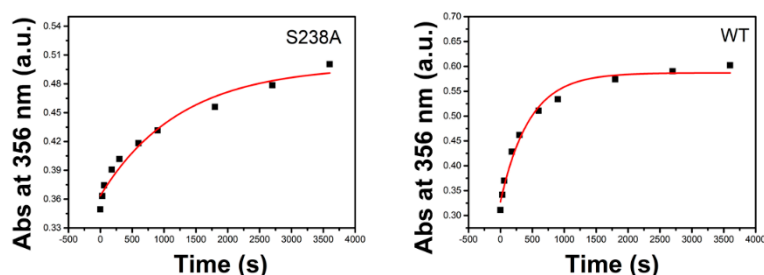

**Figure S3.** Comparison of rate of suicide inactivation between the S238A variant (left) and WT (right). The rate of hydroxycobalamin formation was followed at 356 nm. The suicide inactivation rates were  $3.72 \times 10^{-4}$  and  $1.97 \times 10^{-3} \text{ s}^{-1}$  for S238A and WT, respectively.

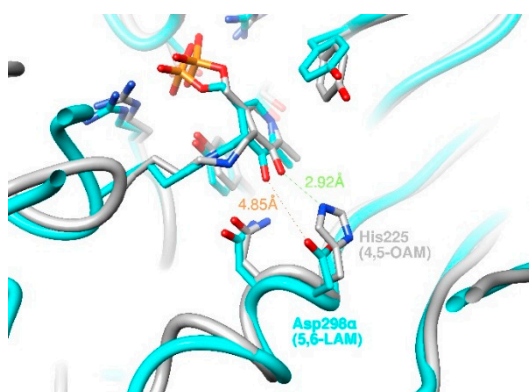

**Figure S4.** Superimpose of active sites of substrate free crystal structure of 5,6-LAM (cyan) and 4,5-OAM (gray). His225 of 4,5-OAM overlays with Asp298α of 5,6-LAM. His225 makes hydrogen bonding interaction with phenolic hydroxyl group of PLP whereas Asp298α is 4.85 Å away from phenolic hydroxyl group of PLP indicating absence of any interaction between PLP and Asp298α.

#### Gaussian Archive Entries for the B3LYP/6-31G(d,P) Optimized Geometries

##### dAPLP

##### S<sup>•</sup>

1|1|UNPC-DESKTOP-TBQL3NN|SP|ROMP2-FC|GTMP2large|C12H16N1O1(2)|LABPC|12

-Nov-2020|0||# romp2 maxdisk=7840MW geom=connectivity gtmp2large scf=tight||Substrate

(1-aminopropane) radical aldimine with deaza-Pyridoxal model gtmp2 energy||0,2|N,0,-

1.72867794,0.18560711,-0.46479394|C,0,-0.75762252,1.01088273,-0.27282032|H,0,-

0.95496797,2.0895123,-0.23751674|C,0,0.6214819,0.577721,-0.0994531|C,0,0.92614231,-

0.81178441,0.12546005|C,0,2.25148205,1.27022163,0.04213924|C,0,2.96491575,1.0546402  
9,0.25648006|C,0,1.66671307,1.52172431,0.09439408|H,0,3.77389137,1.76368079,0.40557  
409|O,0,-0.0274474,-1.73743806,-0.30915084|H,0,-0.89850185,1.24687764,0.41260201|  
C,0,-3.09470466,0.71232012,-0.59458272|C,0,-3.96067104,0.24391972,0.53537493|H,0,-  
3.49810752,0.34772602,-1.54884963|H,0,-3.0783048,1.81362639,-0.63679705|H,0,-  
3.86734755,0.76957773,1.4833267|C,0,-4.61036555,-1.09702047,0.52125252|H,0,-  
5.4168711,-1.16614057,1.2584419|H,0,-5.02506969,-1.33366834,-0.4666265|H,0,-  
3.89257975,-1.9010596,0.75752486|C,0,3.24535171,0.31890375,0.23010278|  
H,0,4.27201618,-0.65301965,0.35999696|C,0,2.53221718,2.74917836,0.00963821|  
H,0,1.96731351,-3.27699942,0.78576132|H,0,2.22752701,-3.18964634,-0.94608875|H,0  
,3.59665046,-2.94837219,0.15953377|C,0,1.39965812,3.01073376,0.12807961|  
H,0,0.95453629,3.37283914,-0.80590268|H,0,0.71978523,3.29131727,0.94102453|  
H,0,2.33276497,3.558759,0.27909202||Version=IA32W-G09RevD.01|State=2-A|HF=-  
593.1802553|MP2=-595.5458377|RMSD=4.902e-009|PG=C01 [X(C12H16N1O1)]||@

**TS1: S<sup>•</sup>→ I<sup>•</sup>**

1|1|UNPC-DESKTOP-TBQL3NN|SP|ROMP2-FC|GTMP2large|C12H16N1O1(2)|LABPC|01  
-Dec-2020|0||# romp2 maxdisk=7840MW geom=connectivity gtmp2large scf=tight||  
Transition State gtmp2 energy calculation for the reaction from Substrate (1-aminopropane)  
radical to Intermediate radical aldimine with deAzaPyridoxal model||0,2|N,0,-1.90443531,  
0.22960755,-0.61807451|C,0,-0.87562587,1.0823896,0.38947797|H,0,1.07947332,  
2.15285327,-0.35389212|C,0,0.4609103,0.61811435,0.15991032|C,0,0.78019949,-  
0.77520044,-0.22075326|C,0,2.08827298,-1.24141856,0.00193592|C,0,2.79799234,1.0661  
1623,0.33511422|C,0,1.51291449,1.54522427,0.12098901|H,0,3.59773889,1.76901271,0.55  
139531|O,0,-0.15914195,-1.70641646,-0.50069244|C,0,-3.22119349,0.10076061,  
0.65210562|C,0,-3.25105293,0.75626018,-0.67129233|H,0,-3.33677163,1.84756256,-  
0.68855523|H,0,-2.93039797,0.71439327,1.49824201|H,0,-3.87140889,0.29022018,-  
1.43931774|C,0,-3.69264003,-1.29449341,0.89263277|H,0,-1.01444069,-1.22889812,-

0.65800231|H,0,-4.69282958,-1.29427272,1.35105252|H,0,-3.0247302,-1.83865789,  
1.56858536|H,0,-3.7608004,-1.85443497,-0.04465955|C,0,2.36949434,-2.71977706,-  
0.0728677|H,0,1.76155695,-3.27810697,0.64758043|H,0,2.12163012,-3.12183408,-1.061494  
75|H,0,3.42362211,-2.92701628,0.13043814|C,0,1.24592943,3.03085801,0.19045343|  
H,0,0.85859791,3.42526107,-0.75712049|H,0,0.51203845,3.28280541,0.9660077|  
H,0,2.16613348,3.57384774,0.42007539|C,0,3.08089421,-0.30526819,0.27924828|  
H,0,4.0971459,-0.65005001,0.45266054||Version=IA32W-G09RevD.01|State=2-A|HF=-  
593.123119|MP2=-595.5261355|RMSD=3.435e-009|PG=C01 [X(C12H16N1O1)]||@

I\*

1|1|UNPC-DESKTOP-TBQL3NN|SP|ROMP2-FC|GTMP2large|C12H16N1O1(2)|LABPC|12  
-Nov-2020|0||# romp2 maxdisk=7840MW geom=connectivity gttmp2large scf=t  
ight||Intermediate (1-aminopropane) radical aldimine with deaza-Pyrido  
xal model gttmp2 energy||0,2|N,0,1.95688415,-0.04691219,0.33330147|C,0,  
0.93209136,0.9289386,0.18480405|H,0,1.23910071,1.97287791,0.16322251|C  
,0,-0.42507627,0.57066418,0.06574351|C,0,-0.86102723,-0.80262079,0.109  
49673|C,0,-2.21599062,-1.14982467,-0.00689688|C,0,-2.75939209,1.218831  
67,-0.21354362|C,0,-1.43019588,1.58922569,-0.10150259|H,0,-3.51477689,  
1.98970865,-0.33976385|O,0,0.01736149,-1.81850548,0.2677061|C,0,3.2524  
4991,0.19438784,-0.34882661|C,0,3.14931236,0.32519207,1.12631392|H,0,3  
.1555612,1.32295107,1.56038037|H,0,3.29992888,1.13420508,-0.89981046|H  
,0,3.53406319,-0.46075267,1.77191756|C,0,3.90814229,-0.98538424,-1.022  
56584|H,0,0.92338307,-1.41872783,0.33693875|H,0,4.97415833,-0.79102032  
, -1.18408122|H,0,3.44781298,-1.18493007,-1.99550159|H,0,3.81266502,-1.  
88560766,-0.40892347|C,0,-2.6120642,-2.60291073,0.04708349|H,0,-2.1240  
5736,-3.17823036,-0.74738659|H,0,-2.30647861,-3.06363355,0.99296362|H,  
0,-3.69439259,-2.71636253,-0.0588785|C,0,-1.04508973,3.04723352,-0.155  
27697|H,0,-0.5455056,3.37507833,0.76528326|H,0,-0.35809481,3.26082287,

-0.98399468|H,0,-1.93044712,3.67350615,-0.29072039|C,0,-3.15096573,-0.  
12853432,-0.16775429|H,0,-4.20316658,-0.38464877,-0.25885356||Version=  
IA32W-G09RevD.01|State=2-A|HF=-593.1504092|MP2=-595.5365304|RMSD=4.171  
e-009|PG=C01 [X(C12H16N1O1)]||@

**TS2: I<sup>•</sup>→ P<sup>•</sup>**

1|1|UNPC-DESKTOP-TBQL3NN|SP|ROMP2-FC|GTMP2large|C12H16N1O1(2)|LABPC|15

-Dec-2020|0||# romp2 maxdisk=7840MW geom=connectivity gtmp2large scf=t

ight||Transition State gtmp2 energy calculation for the reaction from

Intermediate radical to Product (2-aminopropane) radical aldimine with

deAzaPyridoxal model||0,2|N,0,1.9064287,-0.13115248,-0.07679024|C,0,0  
.96286002,0.84098879,-0.10766726|H,0,1.28537181,1.88218177,-0.14237957  
|C,0,-0.43865894,0.54710315,-0.06203408|C,0,-0.91103825,-0.8034791,-0.  
04762985|C,0,-2.28552924,-1.10218533,-0.01049003|C,0,-2.75197556,1.290  
4007,-0.01675056|C,0,-1.40098056,1.60549246,-0.05127163|H,0,-3.4847318  
2,2.0924235,-0.00553462|O,0,-0.06162283,-1.85292747,-0.07647067|C,0,3.  
30510047,0.23895522,0.00711349|C,0,3.00721874,-0.2048819,1.38450843|H,  
0,2.69257324,0.50987788,2.133539|H,0,3.48198858,1.31648657,-0.09529497  
|H,0,3.14588756,-1.23880547,1.67376163|C,0,4.24237064,-0.5878337,-0.85  
082906|H,0,0.86091779,-1.49110716,-0.11800227|H,0,5.28235164,-0.404605  
51,-0.56211754|H,0,4.12476474,-0.33244304,-1.90828946|H,0,4.03153991,-  
1.65464142,-0.73170868|C,0,-2.72868304,-2.54202767,0.00452452|H,0,-2.3  
6689918,-3.0780571,-0.87978347|H,0,-2.32483143,-3.07373124,0.87318573|  
H,0,-3.8193268,-2.61455978,0.03102912|C,0,-0.96927256,3.05346776,-0.07  
406203|H,0,-0.3407276,3.31075776,0.78735221|H,0,-0.3936826,3.29828111,  
-0.97525987|H,0,-1.84116752,3.71194409,-0.05290885|C,0,-3.18703146,-0.

04201215,0.00583758|H,0,-4.25232805,-0.25644412,0.03421155||Version=IA

32W-G09RevD.01|State=2-A|HF=-593.123735|MP2=-595.5272649|RMSD=5.630e-0

09|PG=C01 [X(C12H16N1O1)]||@

P•

1|1|UNPC-DESKTOP-TBQL3NN|SP|ROMP2-FC|GTMP2large|C12H16N1O1(2)|LABPC|11

-Dec-2020|0||# romp2 maxdisk=7840MW geom=connectivity gtmp2large scf=t

ight||Product (2-aminopropane) radical aldimine with deaza-Pyridoxal m

odel gtmp2 energy||0,2|N,0,1.81355347,-0.18206599,0.04377741|C,0,0.947

41936,0.77115116,0.03723614|H,0,1.28414324,1.81537706,0.04847353|C,0,-

0.48826363,0.53243319,0.01537358|C,0,-0.97434963,-0.80471483,0.0074753

7|C,0,-2.36060172,-1.07551797,-0.01167813|C,0,-2.76989292,1.33141867,-

0.01577192|C,0,-1.41017691,1.6148484,0.00355949|H,0,-3.48662746,2.1472

5093,-0.02530865|O,0,-0.14252611,-1.85689996,0.01843472|C,0,3.23777009

,0.14438738,0.05924021|C,0,3.8853654,-0.42790886,1.27984741|H,0,3.2919

8392,-0.70600973,2.14252471|H,0,3.35962826,1.24861833,0.06995989|H,0,4

.96700833,-0.47397353,1.34858707|C,0,3.89544506,-0.37521376,-1.2348151

3|H,0,0.79411191,-1.49496313,0.02990999|H,0,4.96799405,-0.15712447,-1.

23066638|H,0,3.76135299,-1.45700776,-1.32031909|H,0,3.44767501,0.10167

955,-2.1115294|C,0,-2.83453948,-2.50463125,-0.01896838|H,0,-2.45030092

, -3.04506613,-0.89095921|H,0,-2.47357481,-3.04624618,0.86217851|H,0,-3

.9265476,-2.55456757,-0.03347373|C,0,-0.94747436,3.05554713,0.01092515

|H,0,-0.35648266,3.2962687,0.90225188|H,0,-0.32983571,3.29664096,-0.86

203823|H,0,-1.80783822,3.72889377,-0.00196525|C,0,-3.23010929,0.006851

56,-0.02301658|H,0,-4.30090745,-0.18201408,-0.03798863||Version=IA32W-

G09RevD.01|State=2-A|HF=-593.1794512|MP2=-595.5469636|RMSD=1.795e-009|

PG=C01 [X(C12H16N1O1)]||@
